# Supplementary material
Source: Springer Nature journal article supplement (https://www.springermedizin.de/resource/supplementary/13276_2010_8_MOESM4_ESM.pdf/9676556)

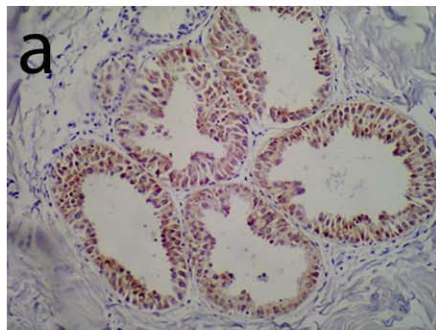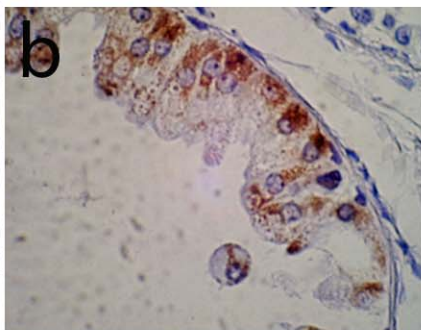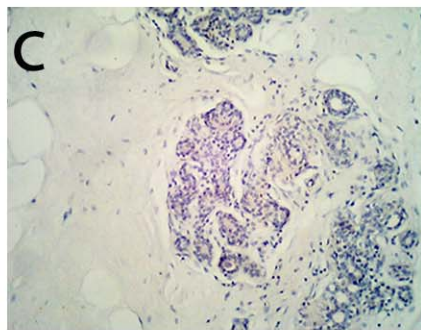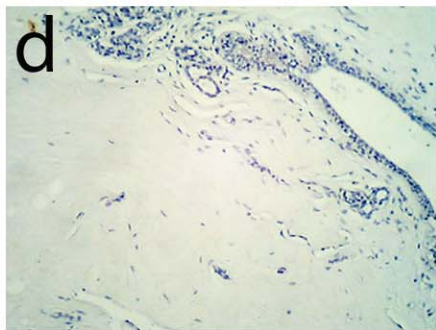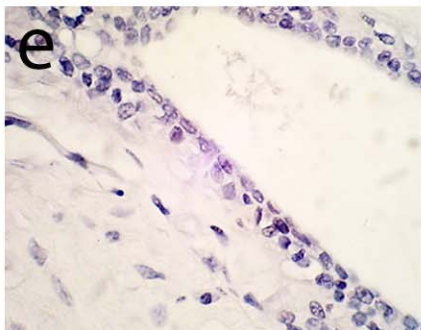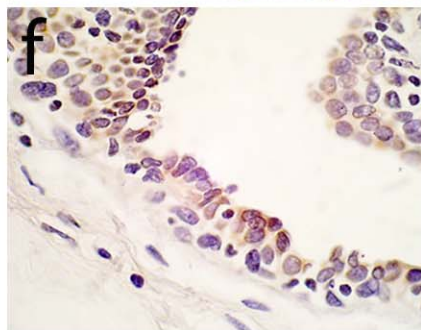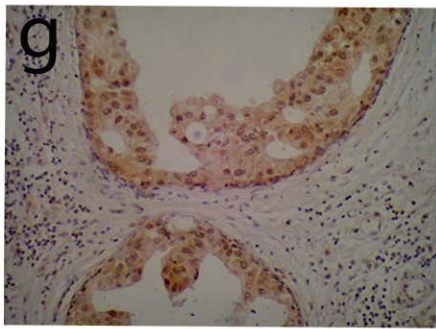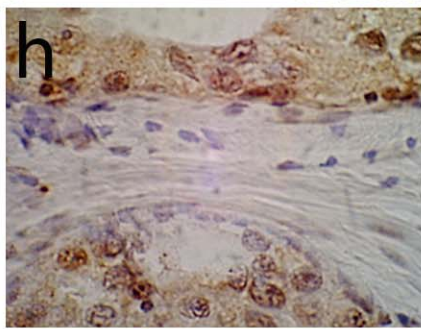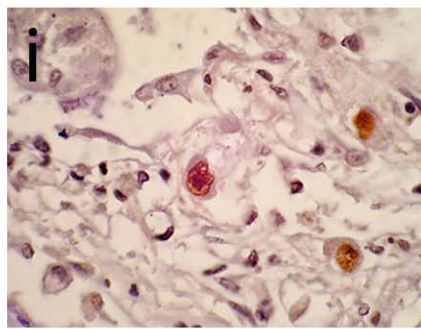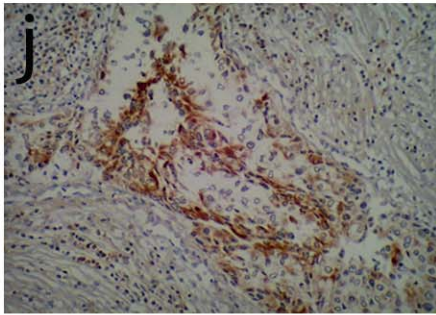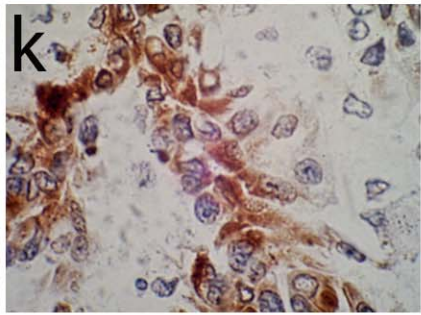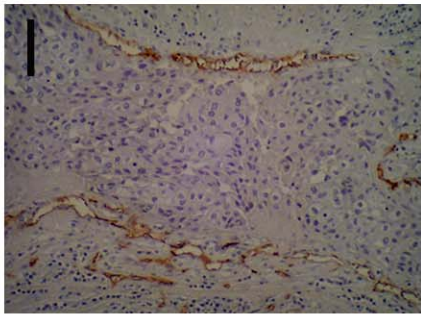

Supplement: MOESM4 [file 9676556]
